# Supplementary material for: In Situ Synthesis of C-N@NiFe2O4@MXene/Ni Nanocomposites for Efficient Electromagnetic Wave Absorption at an Ultralow Thickness Level
Source: MDPI journal article supplement (doi:10.3390/molecules28010233), 2022-12-27
Supplement: s1 [file s1]

## Supplementary Information

# In Situ Synthesis of C-N@NiFe<sub>2</sub>O<sub>4</sub>@MXene/Ni Nanocomposites for Efficient Electromagnetic Wave Absorption at an Ultralow Thickness Level

Qing Sun <sup>1,†</sup>, Xin Yang <sup>1,†</sup>, Tie Shu <sup>1</sup>, Xianfeng Yang <sup>2</sup>, Min Qiao <sup>1</sup>, Dashuang Wang <sup>3</sup>, Zhaohui Liu <sup>1,\*</sup>, Xinghua Li <sup>2</sup>, Jinsong Rao <sup>3</sup>, Yuxin Zhang <sup>3</sup>, Pingan Yang <sup>4</sup> and Kexin Yao <sup>1,\*</sup>

<sup>1</sup> Multi-scale Porous Materials Center, Institute of Advanced Interdisciplinary Studies, School of Chemistry and Chemical Engineering, Chongqing University, Chongqing 400044, China

<sup>2</sup> State Key Laboratory of Photon-Technology in Western China Energy, School of Physics, Northwest University, Xi'an 710127, China

<sup>3</sup> College of Material Science and Engineering, Chongqing University, Chongqing 400044, China

<sup>4</sup> School of Automation, Chongqing University of Posts and Telecommunications, Chongqing 400065, China

\* Correspondence: zhaohui.liu@cqu.edu.cn (Z.L.); kexinyao@cqu.edu.cn (K.Y.)

† These authors contributed equally to this work.

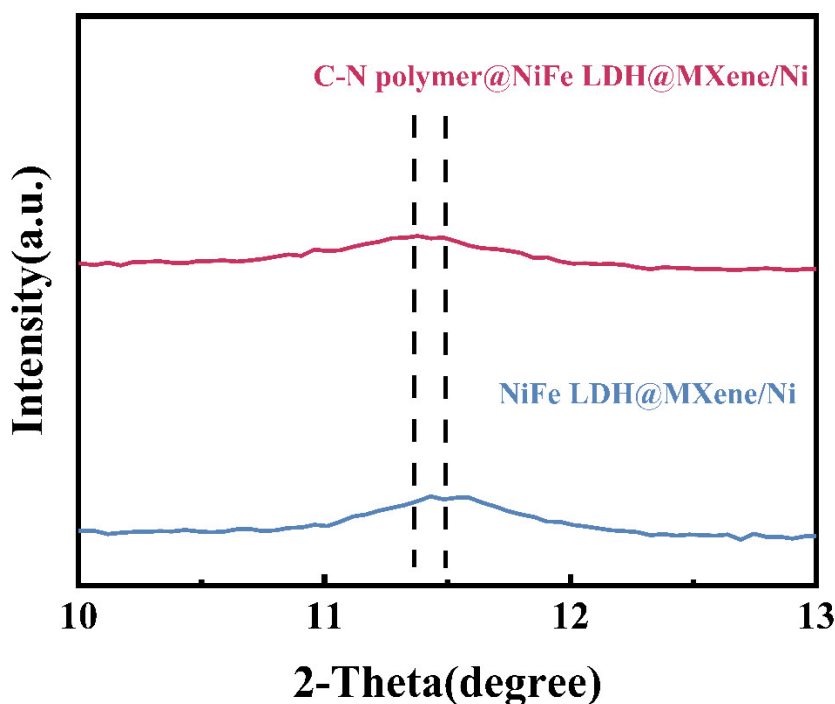

Figure S1. The partially enlarged detail of XRD patterns.

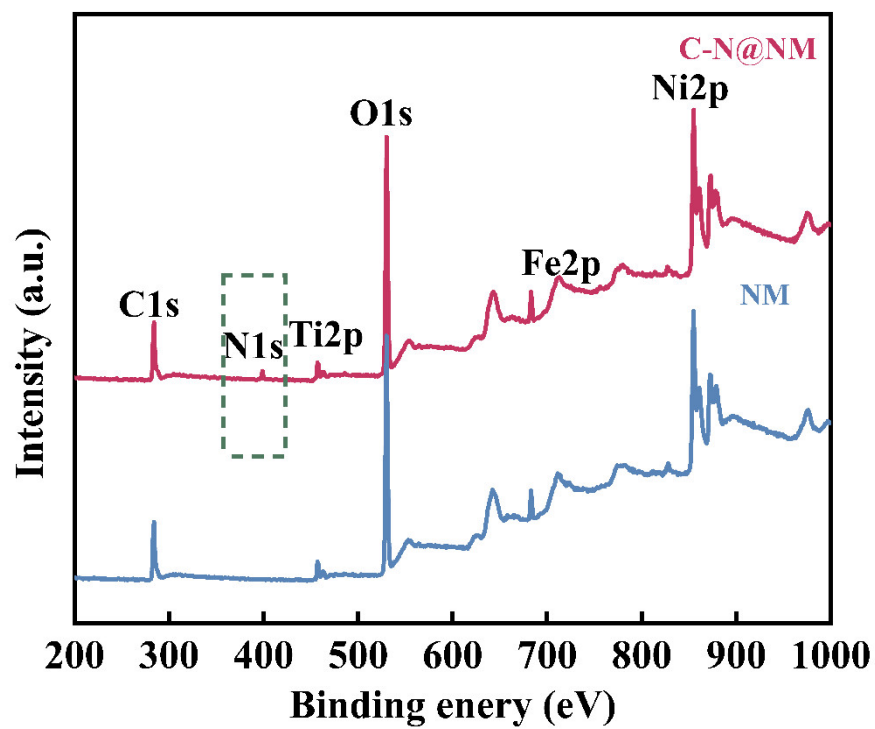

**Figure S2.** The wide-scan XPS spectrum of NM and C-N@NM.

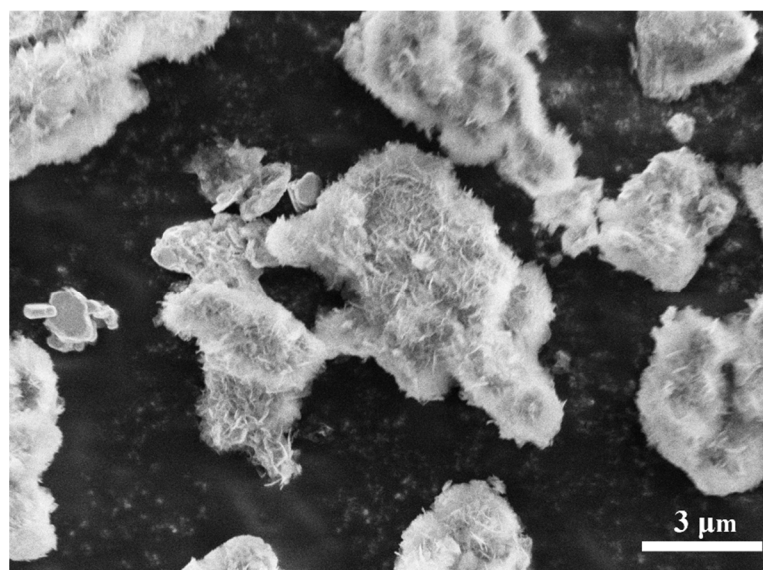

**Figure S3.** SEM image of NiFe LDH@MXene/Ni.

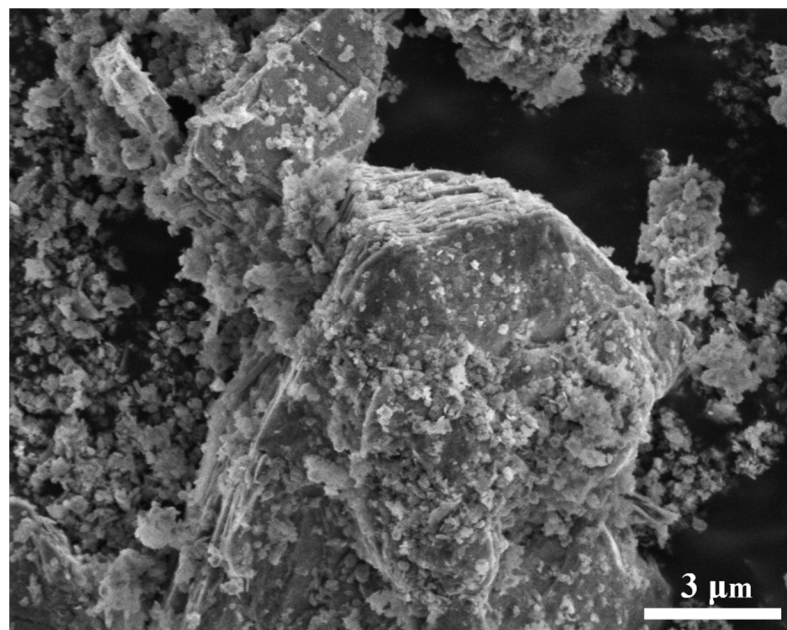

**Figure S4.** SEM image of NM.
